# Supplementary material for: Contrasted phylogeographic patterns of hydrothermal vent gastropods along South West Pacific: Woodlark Basin, a possible contact zone and/or stepping-stone
Source: PubMed Central journal article supplement (PMC9534440; doi:10.1371/journal.pone.0275638), 2022-10-05

A

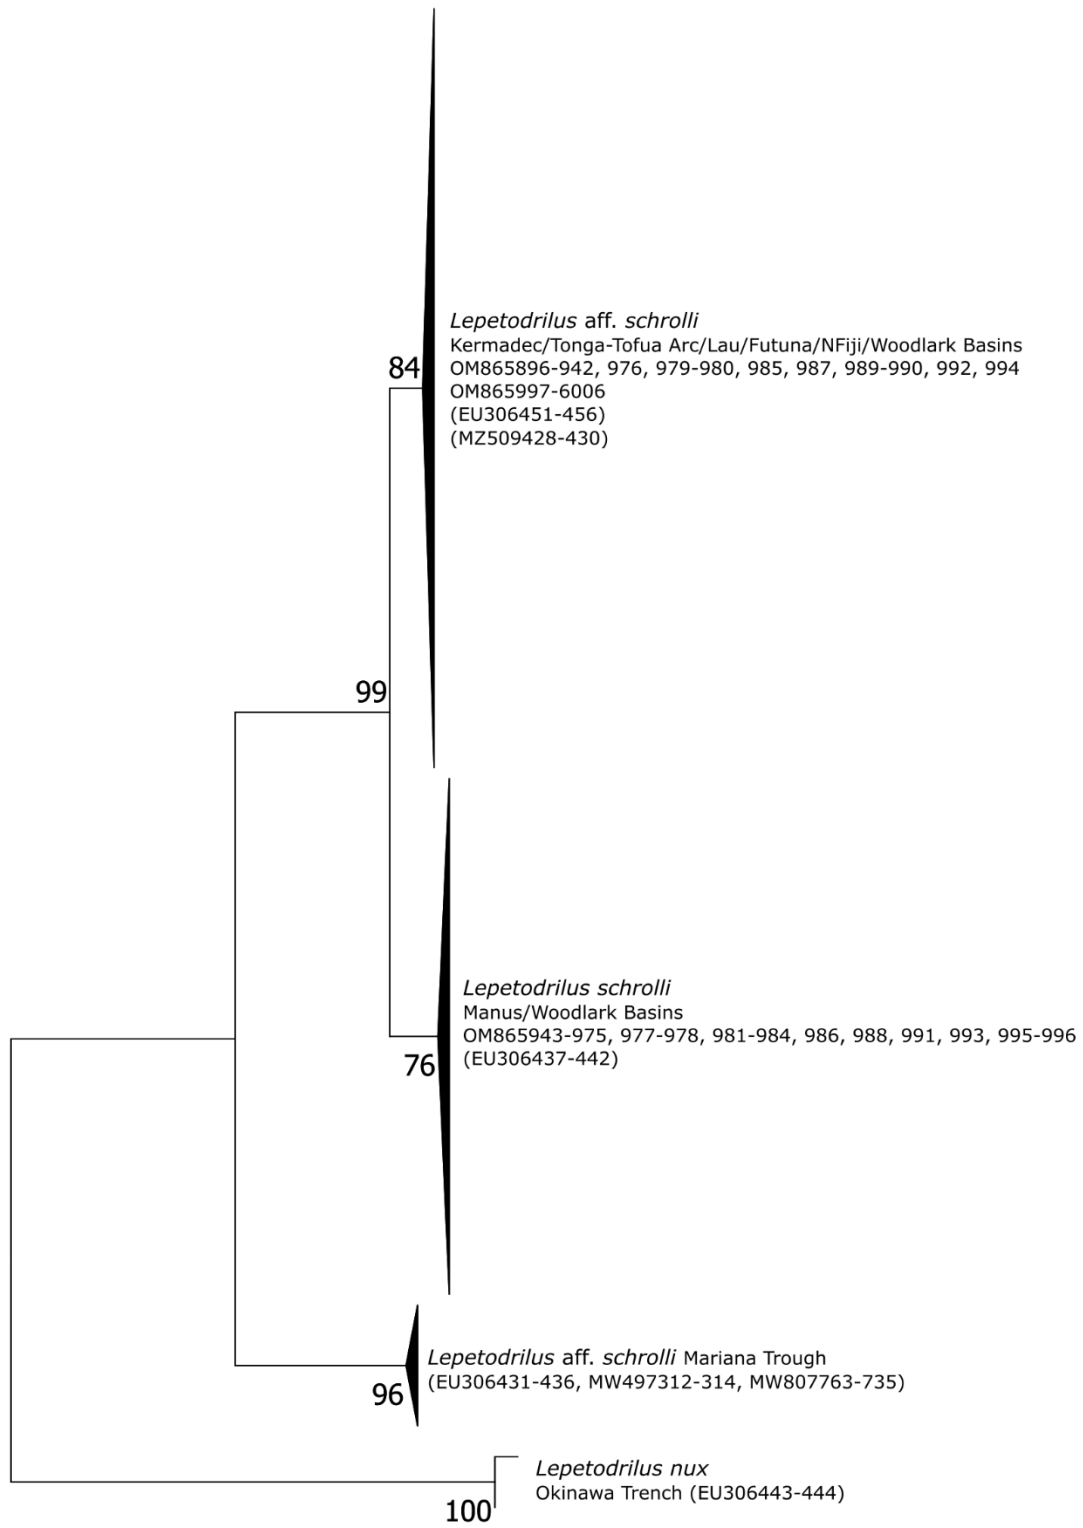

B

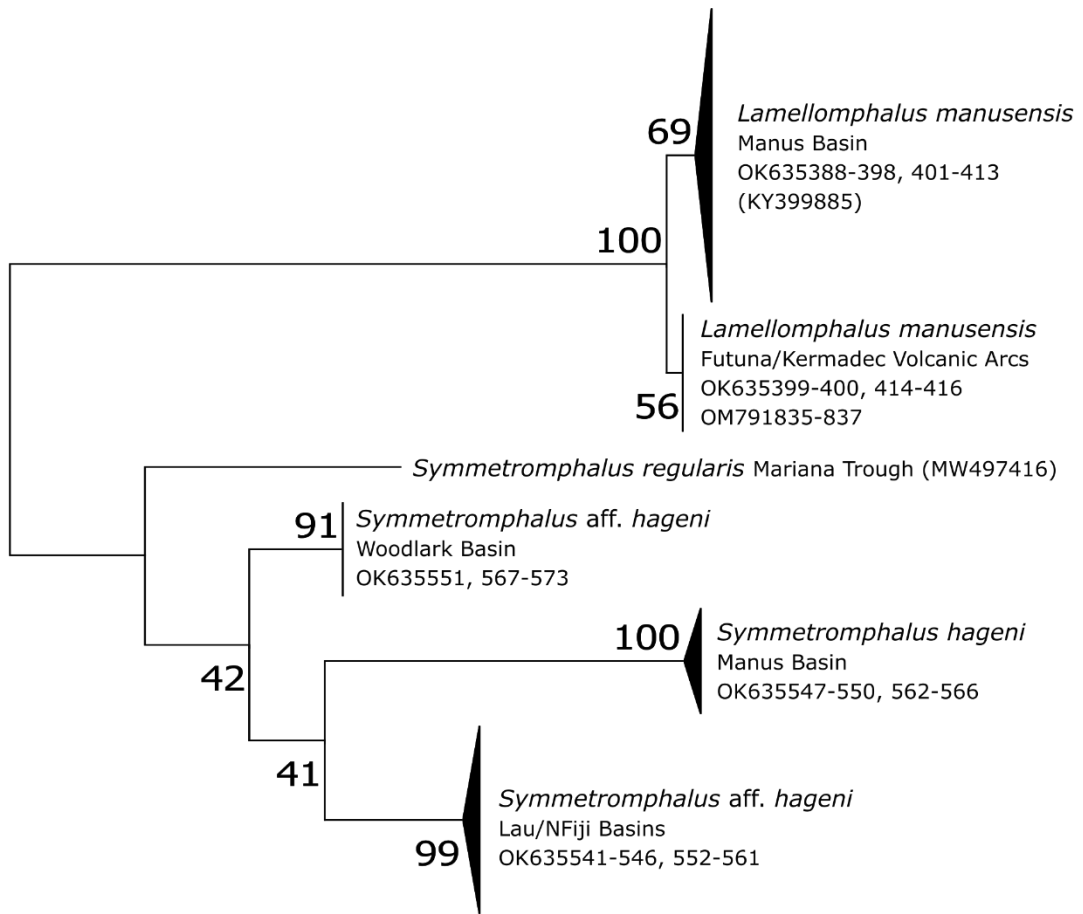

0.020

C

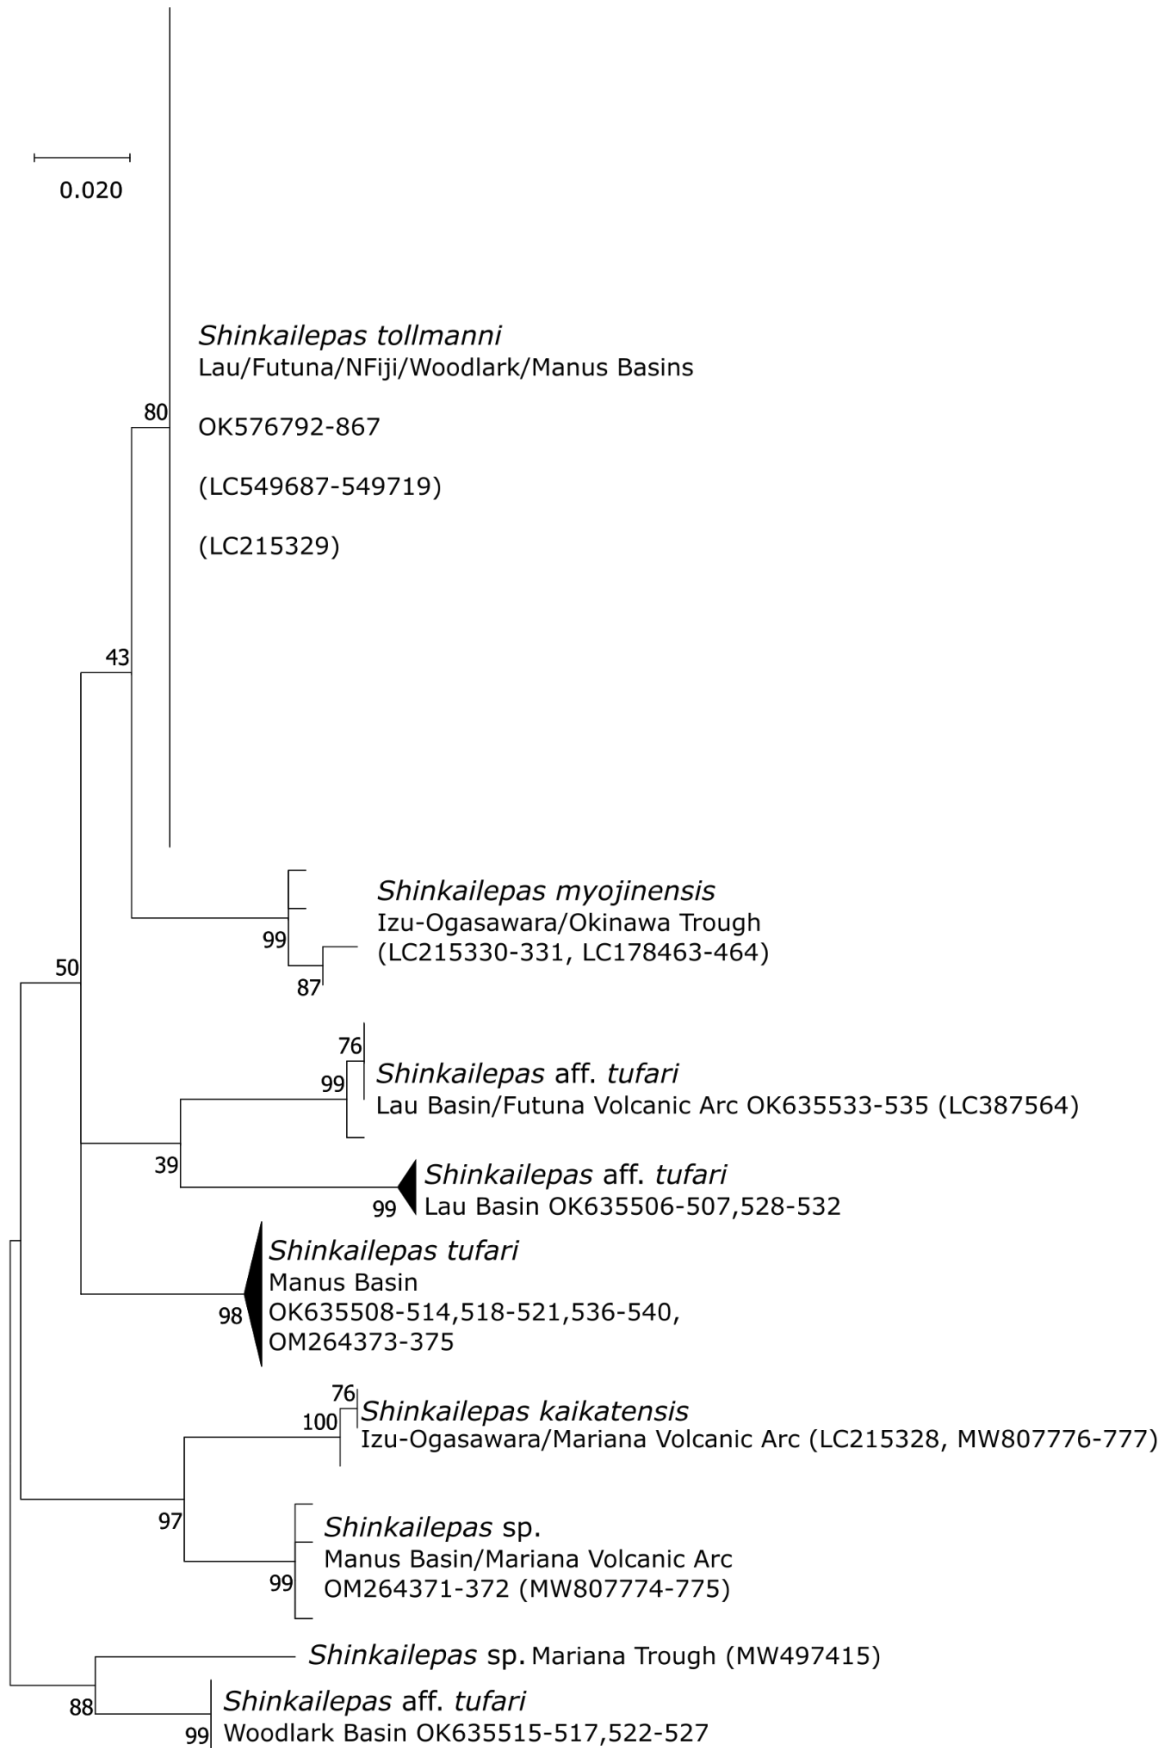

D

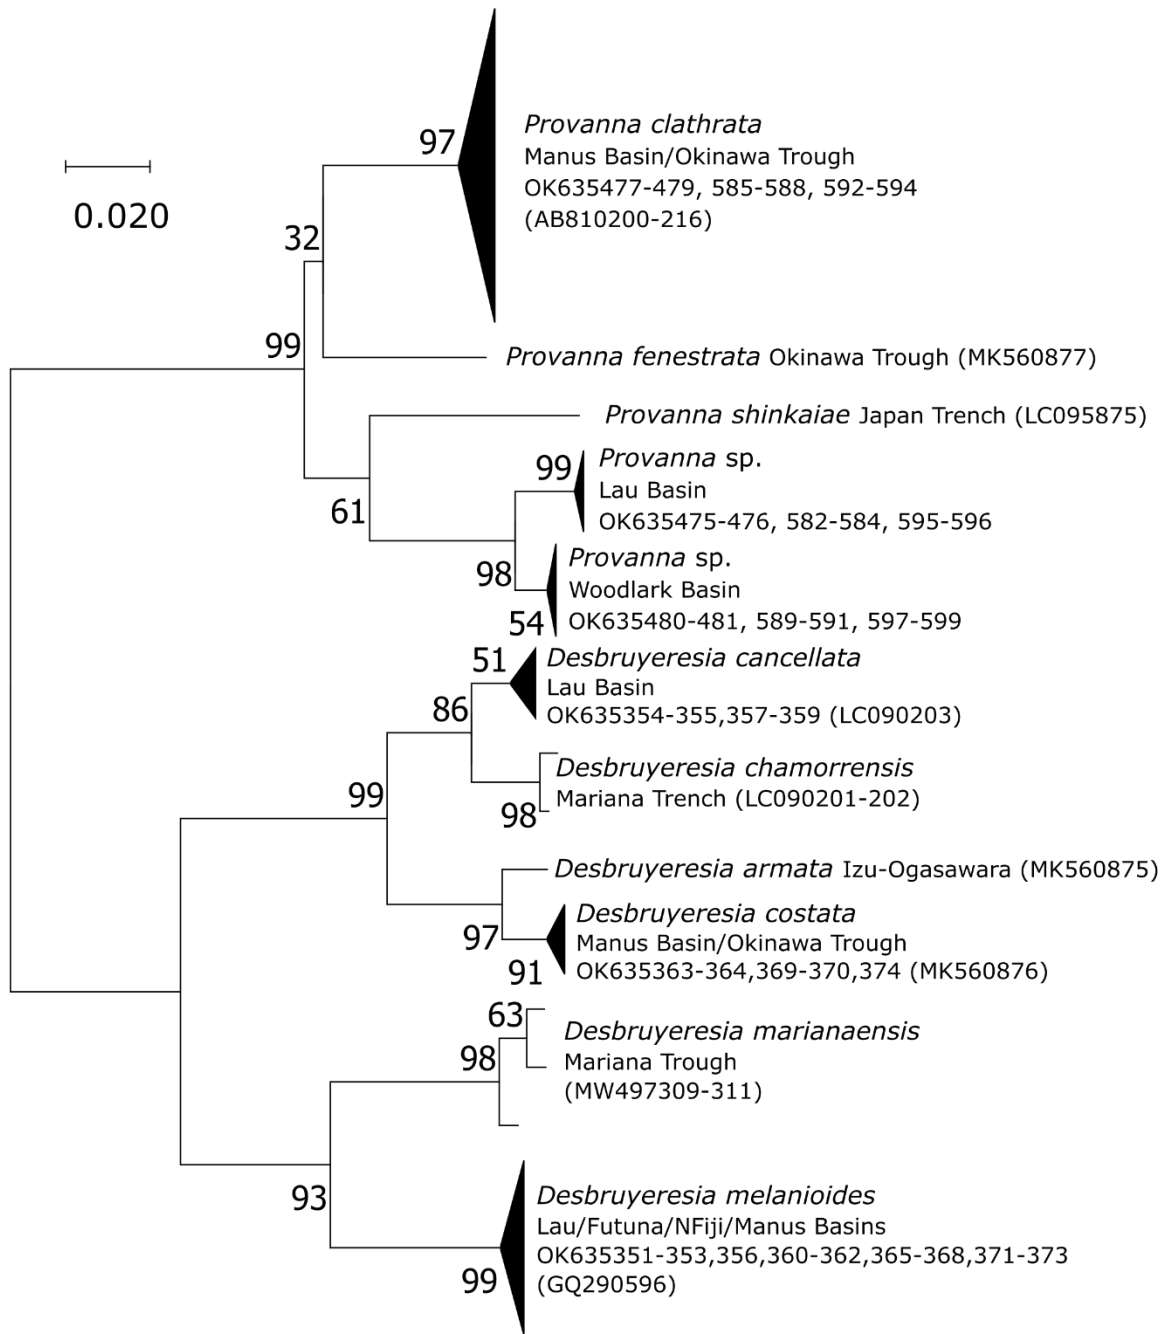

Supplement: pone.0275638.s001.pdf [file pone.0275638.s001.pdf]
